# Supplementary material for: A hollow nano-flower NiCo2O4@Nb2CTx MXene heterostructure via interfacial engineering for high-performance flexible supercapacitor electrodes
Source: Royal Society of Chemistry journal article supplement (doi:10.1039/d3ta02729e), 2023-01-01
Supplement: d3ta02729e1.pdf [file d3ta02729e1.pdf]

**Hollow Nano-flowers NiCo<sub>2</sub>O<sub>4</sub>@Nb<sub>2</sub>CO<sub>x</sub> MXene Heterostructure via Interfacial Engineering for High-performance Flexible Supercapacitor Electrodes**

Baolei Shen<sup>a</sup>, Xilin Liao<sup>a</sup>, Xianjin Hu<sup>a</sup>, Hai-Tao Ren<sup>a</sup>, Jia-Horng Lin<sup>a,b,c,d,e</sup>, Ching-Wen Lou<sup>a,b,f,g,h,\*</sup>, Ting-Ting Li<sup>a,i,\*</sup>

<sup>a</sup> Innovation Platform of Intelligent and Energy-Saving Textiles, School of Textile Science and Engineering, Tiangong University, Tianjin 300387, China

<sup>b</sup> Advanced Medical Care and Protection Technology Research Center, College of Textile and Clothing, Qingdao University, Qingdao 266071, China

<sup>c</sup> Advanced Medical Care and Protection Technology Research Center, Department of Fiber and Composite Materials, Feng Chia University, Taichung 407802, Taiwan

<sup>d</sup> School of Chinese Medicine, China Medical University, Taichung 404333, Taiwan

<sup>e</sup> Ocean College, Minjiang University, Fuzhou 350108, China

<sup>f</sup> Department of Bioinformatics and Medical Engineering, Asia University, Taichung 413305, Taiwan

<sup>g</sup> Department of Medical Research, China Medical University Hospital, China Medical University, Taichung 404332, Taiwan

<sup>i</sup> Fujian Key Laboratory of Novel Functional Textile Fibers and Materials, Minjiang University, Fuzhou 350108, China

<sup>h</sup> Tianjin and Ministry of Education Key Laboratory for Advanced Textile Composite Materials, Tiangong University, Tianjin 300387, China.

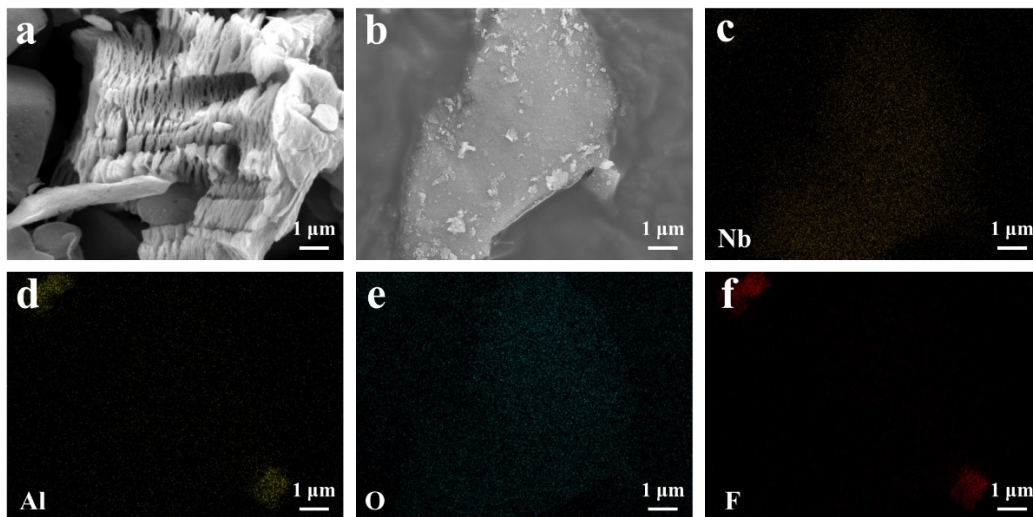

Fig.S1 (a) and (b) are the images of multi-layers and few-layers Nb<sub>2</sub>CTx MXene, respectively. (c)-(f) are the distribution of the four elements Nb Al O and F on the surface of Nb<sub>2</sub>CTx MXene, respectively.

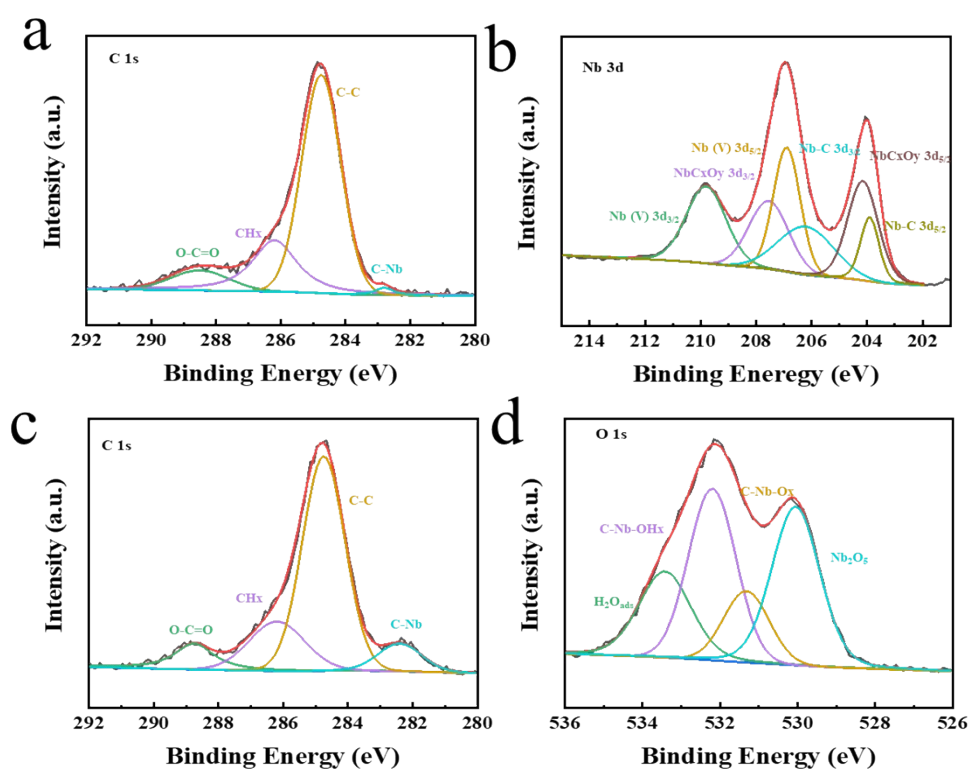

Fig.S2 (a) C 1s high-resolution spectra of NiCo<sub>2</sub>O<sub>4</sub>@Nb<sub>2</sub>CTx-2 composite, (c-d) Nb 3d, C 1s and O 1s high-resolution spectra of pure Nb<sub>2</sub>CTxMXene.

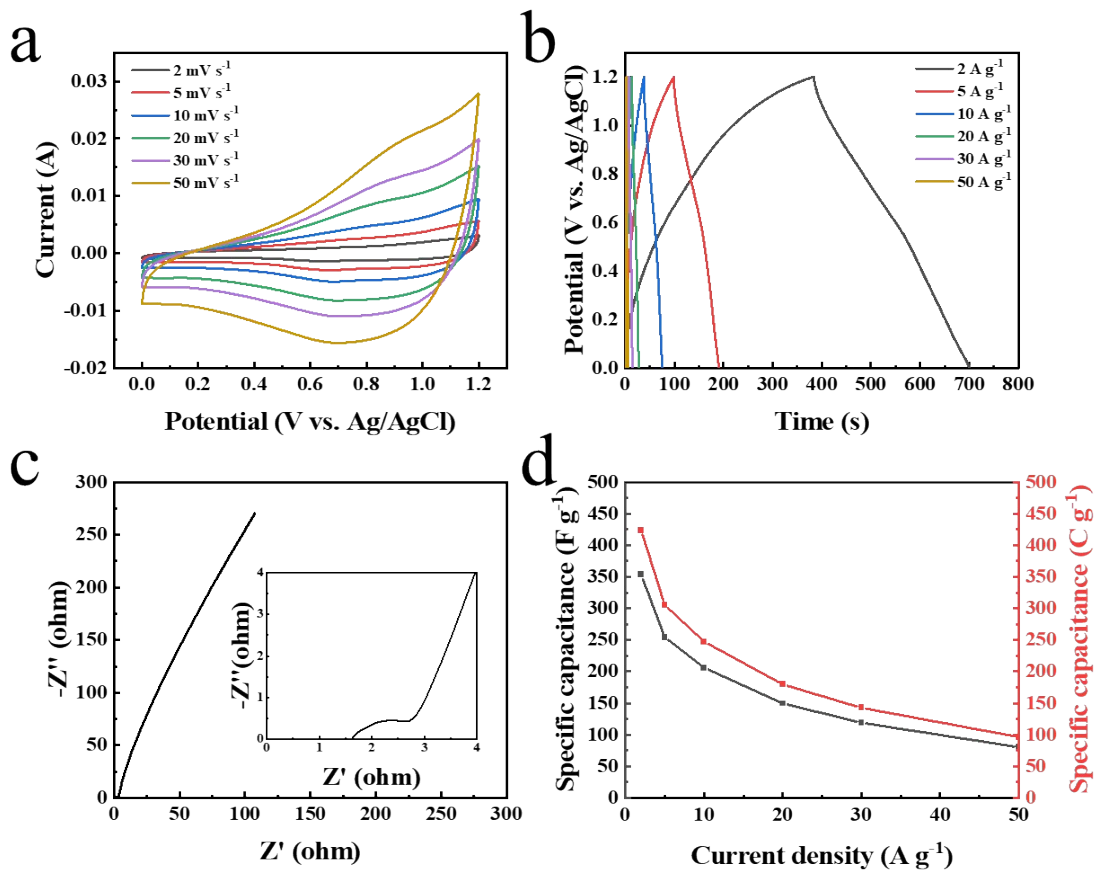

Fig.S3. Electrochemical performances of  $\text{NiCo}_2\text{O}_4@\text{Nb}_2\text{CTx}-2$  electrodes in  $1\text{M Na}_2\text{SO}_4$  electrolyte. (a) CV and (b) GCD curves at different scan rates and current densities, respectively; (c) The EIS curves of  $\text{NiCo}_2\text{O}_4@\text{Nb}_2\text{CTx}-2$  and  $\text{NiCo}_2\text{O}_4@\text{Nb}_2\text{CTx}-3$  electrodes; (d) Specific capacitance change curves over different current densities.

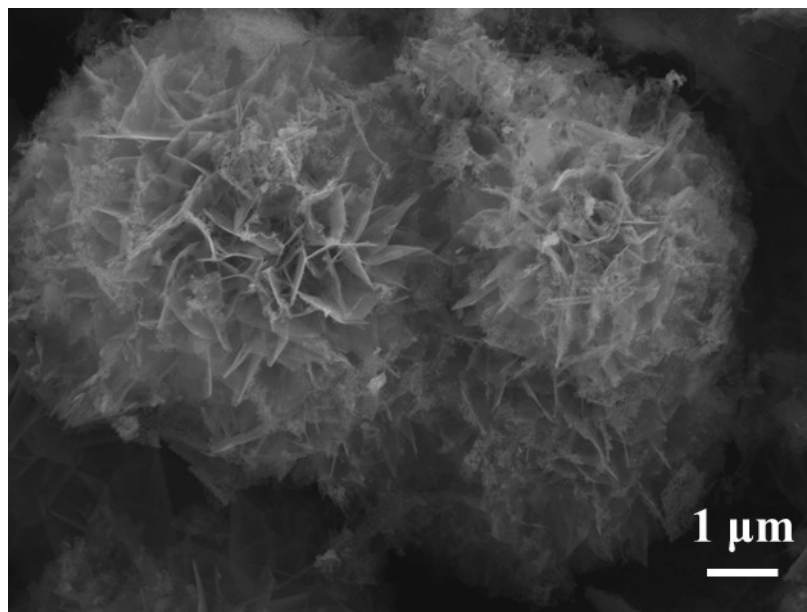

Fig.S4. SEM image of the  $\text{NiCo}_2\text{O}_4@\text{Nb}_2\text{CTx}-2$  composite after 5000 cycles.

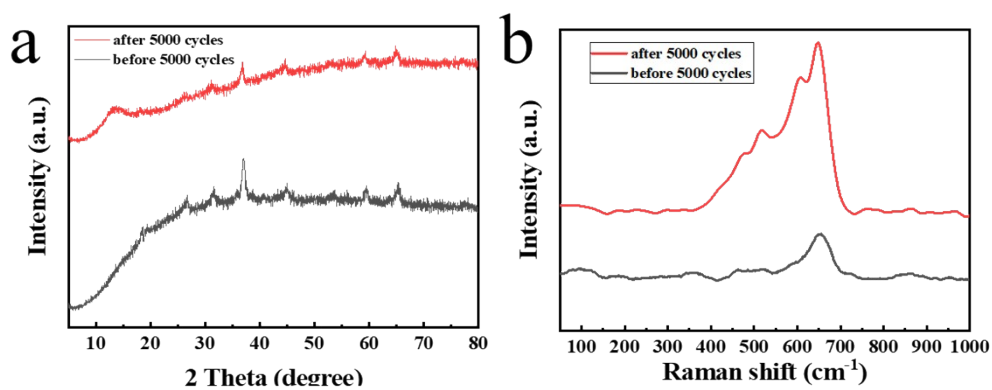

Fig.S5. (a) and (b) are the XRD and Raman pattern before and after 5000 cycles of the NiCo<sub>2</sub>O<sub>4</sub>@Nb<sub>2</sub>CTx-2 electrode.

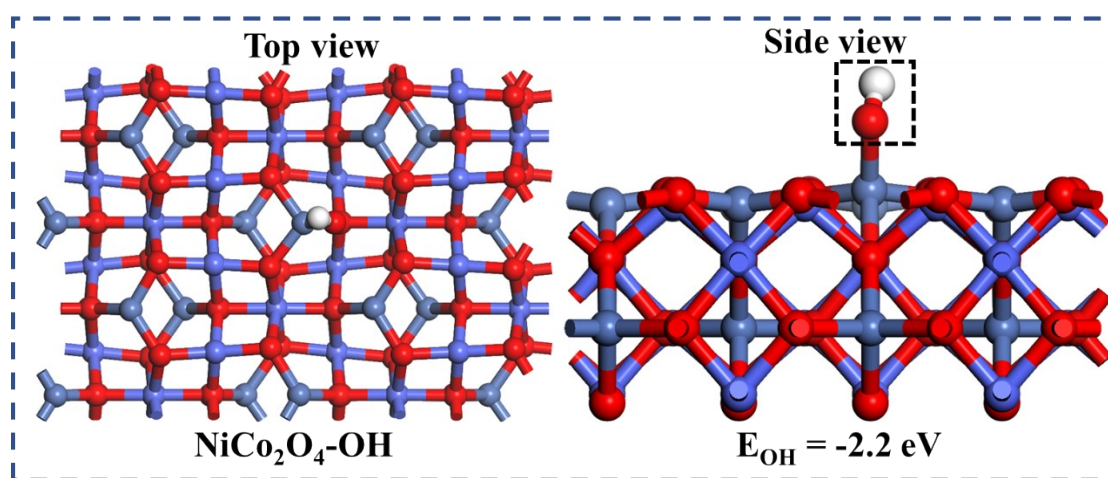

Fig.S6 The structure of NiCo<sub>2</sub>O<sub>4</sub>-OH.

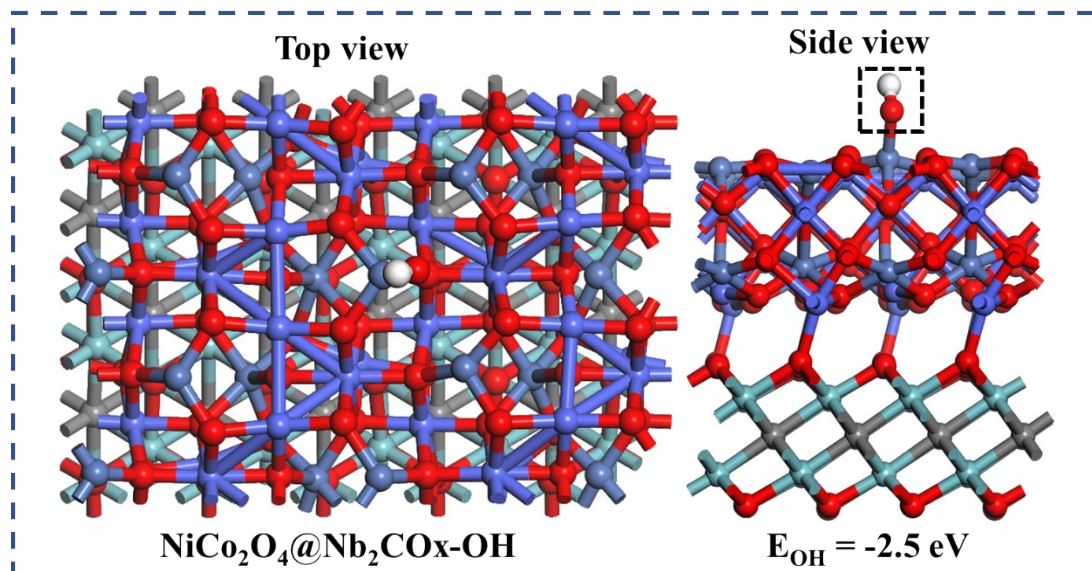

Fig.S7 The structure of NiCo<sub>2</sub>O<sub>4</sub>@Nb<sub>2</sub>CTx-OH.

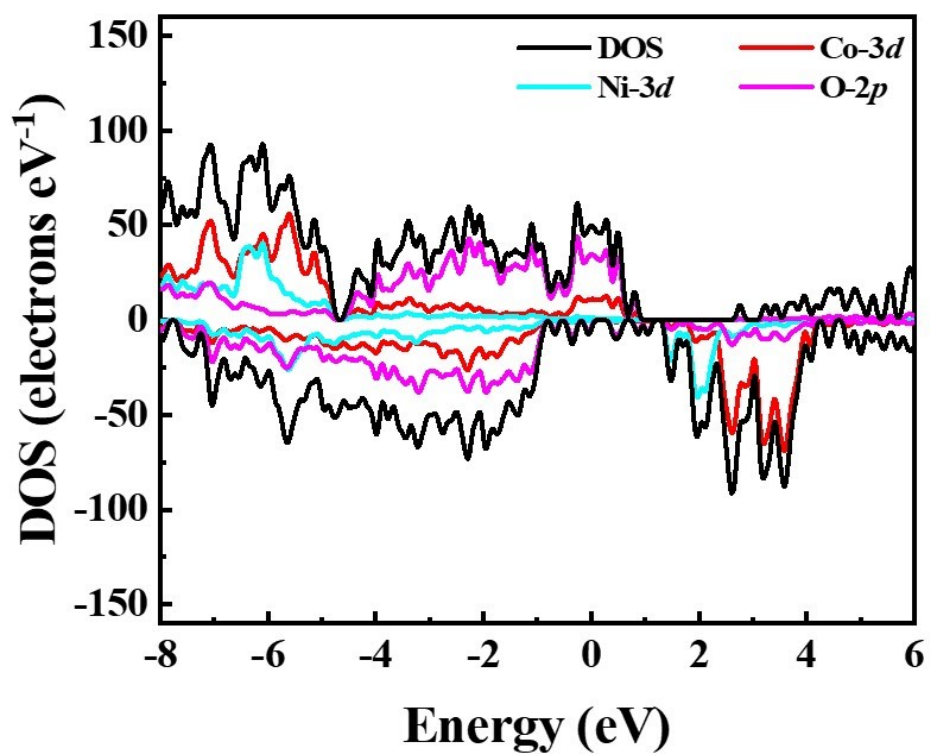

Fig.S8. DOS of pure NiCo<sub>2</sub>O<sub>4</sub>.

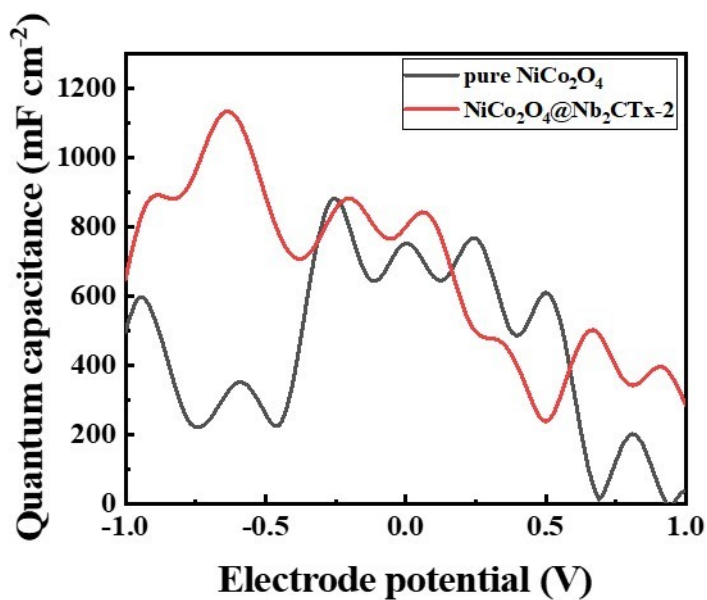

Fig.S9. Quantum capacitance plot for pure NiCo<sub>2</sub>O<sub>4</sub> and NiCo<sub>2</sub>O<sub>4</sub>@Nb<sub>2</sub>CTx-2 composite.
